# Supplementary material
Source: Springer Nature journal article supplement (https://www.springermedizin.de/resource/supplementary/13229_2014_133_MOESM1_ESM.pdf/9676254)

a

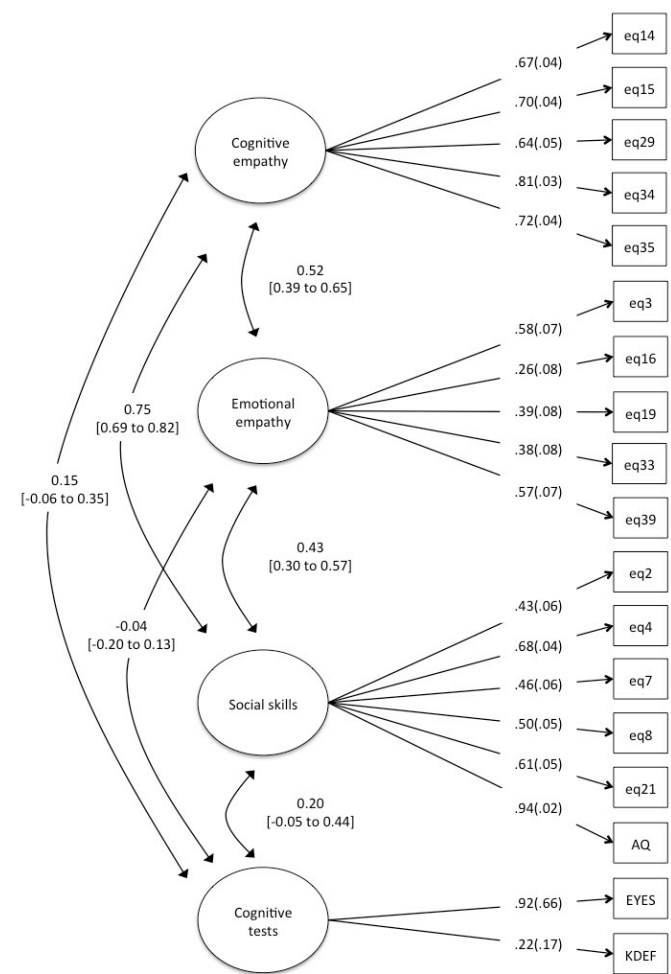

b

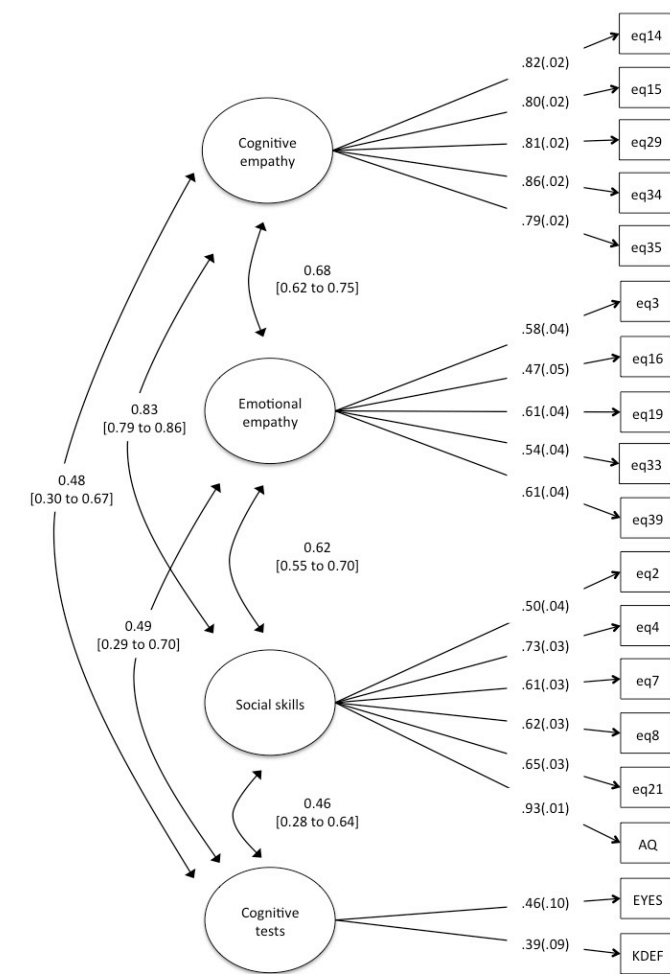

c

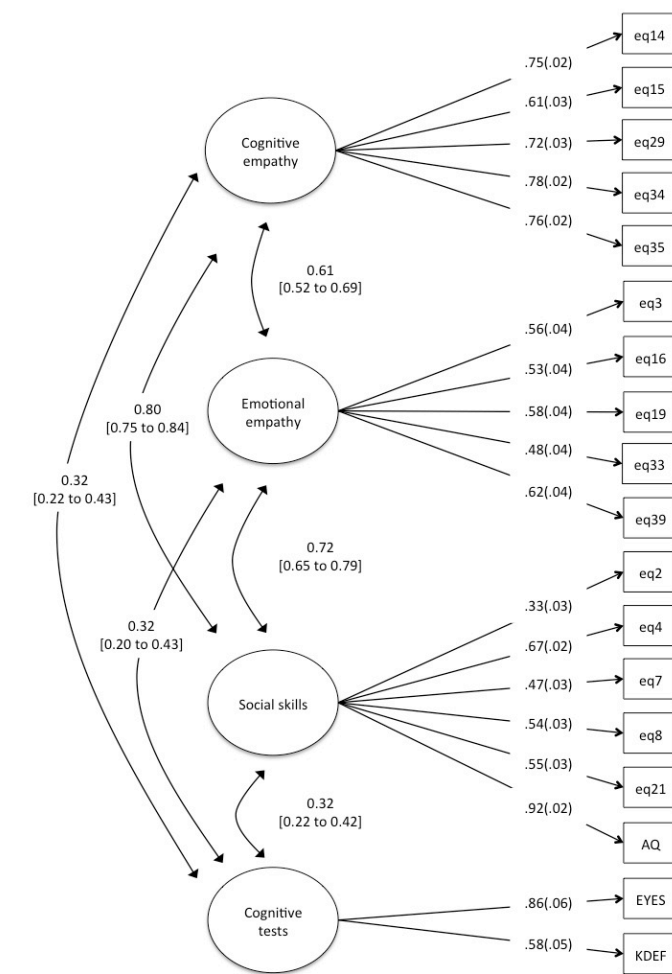

Supplement: MOESM1 [file 9676254]
